# Supplementary material for: Dietary Intake of Folate and Assessment of the Folate Deficiency Prevalence in Slovenia Using Serum Biomarkers
Source: MDPI journal article supplement (doi:10.3390/nu13113860), 2021-10-28
Supplement: s1 [file s1]

**Supplementary Table S1.** Mean (SD) and model adjusted mean (95% CI) usual daily intake of folate by sociodemographic and lifestyle parameters for the three age cohorts. Models adjusted for daily energy intakes (kcal/day), dietary fruit/vegetables intakes (g/day), dietary bread intakes (g/day).

| Variable          | Level                         | Adolescents (10–17 Years Old) |                                  | Adults (18–64 Years Old) |                                   | Elderly (65–74 Years Old) |                                  |
|-------------------|-------------------------------|-------------------------------|----------------------------------|--------------------------|-----------------------------------|---------------------------|----------------------------------|
|                   |                               | Mean (SD)                     | Adjusted mean (CI)               | Mean (SD)                | Adjusted mean (CI)                | Mean (SD)                 | Adjusted mean (CI)               |
| Overall N (%)     |                               | 468 (37.5)                    |                                  | 364 (29.2)               |                                   | 416 (33.3)                |                                  |
| Sex               | Male                          | 300.5 (120.8)                 | 278.7 (267.9–289.5) <sup>a</sup> | 304.3 (103.4)            | 291.1 (277.5–304.7)               | 277.7 (104.0)             | 269.7 (257.5–282.0) <sup>a</sup> |
|                   | Female                        | 273.6 (94.8)                  | 299.7 (288.4–311.1) <sup>b</sup> | 271.7 (82.7)             | 294.2 (281.2–307.3)               | 274.3 (89.7)              | 289.5 (276.9–302.1) <sup>b</sup> |
| Residential area  | Rural                         | 287.3 (117.0)                 | 290.7 (280.9–300.5)              | 282.0 (93.4)             | 280.0 (268.0–292.1) <sup>b</sup>  | 273.8 (96.2)              | 272.2 (261.1–283.3)              |
|                   | Intermediate                  | 291.1 (88.8)                  | 283.2 (264.2–302.2)              | 299.2 (96.8)             | 319.4 (296.8–342.0) <sup>a</sup>  | 276.6 (109.1)             | 290.3 (271.0–309.7)              |
|                   | Urban                         | 284.8 (104.8)                 | 287.6 (273.0–302.2)              | 290.8 (96.8)             | 301.0 (285.4–316.5) <sup>ab</sup> | 280.0 (91.9)              | 286.6 (270.6–302.5)              |
| Education         | No university degree          | n.a.                          | n.a.                             | 275.1 (86.6)             | 285.4 (274.6–296.3) <sup>a</sup>  | 274.2 (95.6)              | 278.0 (269.0–287.0)              |
|                   | University degree             |                               |                                  | 313.4 (105.2)            | 309.1 (292.0–326.1) <sup>b</sup>  | 284.7 (104.2)             | 285.8 (264.9–306.8)              |
| Family net income | Below average                 | n.a.                          | n.a.                             | 271.7 (97.2)             | 293.4 (278.0–308.9)               | 274.8 (96.8)              | 281.9 (272.2–291.6)              |
|                   | Above average                 |                               |                                  | 299.9 (92.6)             | 292.3 (280.5–304.0)               | 286.6 (102.9)             | 273.1 (257.2–289.1)              |
| Employment        | Employed                      | n.a.                          | n.a.                             | 303.2 (95.5)             | 304.6 (293.0–316.2) <sup>A</sup>  | n.a.                      | n.a.                             |
|                   | Unemployed                    |                               |                                  | 240.5 (84.1)             | 263.4 (235.2–291.6) <sup>B</sup>  |                           |                                  |
|                   | Student                       |                               |                                  | 292.4 (98.9)             | 285.2 (250.9–319.6) <sup>AB</sup> |                           |                                  |
|                   | Retired                       |                               |                                  | 258.5 (78.5)             | 273.4 (251.9–294.9) <sup>B</sup>  |                           |                                  |
| Smoking status    | Current, occasional ex-smoker | 262.1 (113.3)                 | 266.0 (236.6–295.5)              | 281.6 (92.7)             | 292.4 (279.4–305.4)               | 278.1 (104.1)             | 277.4 (264.8–290.0)              |
|                   | No smoker                     | 289.0 (109.2)                 | 290.4 (282.6–298.1)              | 291.8 (95.8)             | 293.0 (280.6–305.4)               | 274.4 (91.4)              | 281.1 (269.5–292.7)              |
| BMI               | Normal                        | 295.2 (118.3))                | 293.5 (284.1–302.8) <sup>A</sup> | 291.7 (98.6)             | 306.4 (291.5–321.3) <sup>a</sup>  | 266.3 (83.0)              | 271.9 (255.1–288.6)              |
|                   | Overweight and obese          | 273.0 (90.3)                  | 280.3 (267.7–292.8) <sup>B</sup> | 284.1 (91.5)             | 284.6 (273.3–295.8) <sup>b</sup>  | 279.4 (101.6)             | 281.9 (272.5–291.2)              |
| IPAQ              | Low intensity                 | 294.6 (103.4)                 | 286.2 (270.5–301.9)              | 294.0 (95.3)             | 301.4 (286.6–316.2)               | 277.0 (112.5)             | 280.9 (267.0–294.7)              |
|                   | Moderate                      | 287.7 (110.2)                 | 296.0 (282.3–309.7)              | 281.8 (89.4)             | 287.4 (271.6–303.2)               | 274.4 (88.2)              | 279.8 (265.6–294.1)              |
|                   | High intensity                | 285.2 (112.8)                 | 285.2 (274.1–296.3)              | 285.0 (98.8)             | 288.4 (273.3–303.6)               | 277.9 (91.2)              | 277.4 (263.3–291.4)              |
| Special diet      | No special diet               | 286.8 (108.5)                 | 287.7 (280.2–295.3)              | 288.0 (102.4)            | 291.8 (282.7–300.9)               | 276.3 (99.5)              | 280.0 (271.3–288.6)              |
|                   | Medical and/or weight loss    | 300.2 (144.8)                 | 322.6 (278.4–366.9)              | 279.7 (102.4)            | 302.3 (272.3–332.3)               | 273.8 (79.4)              | 275.4 (252.6–298.2)              |
| Behavioural diet  | No diet                       | 289.6 (109.4)                 | 289.2 (281.6–296.7)              | 286.7 (95.0)             | 292.5 (282.7–300.8)               | 276.0 (97.1)              | 279.2 (271.2–287.3)              |
|                   | Veget./vegan                  | 199.7 (72.5)                  | 266.9 (212.8–321.0)              | 309.9 (65.6)             | 305.0 (242.7–367.4)               | 275.0 (127.1)             | 299.6 (252.6–298.2)              |

**Note:** Body mass index (BMI) was considered as normal below 25 kg/m<sup>2</sup>, except for adolescents, where sex/age adjusted cut-off points [22,23] were used. Linear regression analysis conducted on samples with excluded missing values (Family net income:  $n = 57$  (adults) and 40 (elderly); International Physical Activity Questionnaire (IPAQ):  $n = 5$  (adolescents), 4 (adults), 6 (elderly); Difference in marginal linear predictions per different socio-demographic and other individual related characteristics within age categories:  $p < 0.001$  energy (adolescents),  $p = 0.005$  intake of fruits and vegetables (adolescents),  $p < 0.01$  sex (adolescents),  $p = 0.1$  BMI (adolescents);  $p < 0.001$  energy (adults),  $p < 0.01$  intake of fruits and vegetables (adults),  $p < 0.01$  residential area (adults),  $p < 0.05$  BMI (adults),  $p < 0.05$  education (adults),  $p < 0.05$  employment (adults);  $p < 0.001$  energy (elderly),  $p < 0.001$  intake of fruits and vegetables (elderly),  $p < 0.01$  intake of bread (elderly),  $p < 0.05$  sex (elderly). The pairwise comparisons are performed using Sidak adjustment; different superscript letters indicate significant differences between groups. Pairwise difference consider significant at  $p < 0.1$  indicated by uppercase letters, while lowercase letters indicate difference at  $p < 0.05$ .

**Supplementary Table S2.** Relative contribution of selected food categories to usual daily dietary folate intake in different age groups (% of total dietary folate intake).

| Food category                     | Food category contribution in total daily dietary folate intake (%) |                         |                          |
|-----------------------------------|---------------------------------------------------------------------|-------------------------|--------------------------|
|                                   | Adolescents<br>(10-17 years)                                        | Adults<br>(18-64 years) | Elderly<br>(65-74 years) |
| <b>Fruit and vegetables</b>       | <b>27.31</b>                                                        | <b>39.06</b>            | <b>43.59</b>             |
| Vegetables                        | 19.92                                                               | 30.47                   | 33.01                    |
| Fruit                             | 7.40                                                                | 8.59                    | 10.59                    |
| Nuts and seeds                    | 1.10                                                                | 2.22                    | 1.14                     |
| Jam and spreads                   | 0.18                                                                | 0.17                    | 0.29                     |
| <b>Bread and bakery products</b>  | <b>32.15</b>                                                        | <b>25.05</b>            | <b>30.93</b>             |
| Bread                             | 21.47                                                               | 21.51                   | 23.94                    |
| <i>White bread</i>                | 16.69                                                               | 16.03                   | 16.04                    |
| <i>Brown bread</i>                | 4.77                                                                | 5.48                    | 7.90                     |
| Biscuits                          | 6.16                                                                | 3.50                    | 3.23                     |
| Cakes, muffins, and pastry        | 4.52                                                                | 3.08                    | 3.76                     |
| <b>Cereal and cereal products</b> | <b>12.00</b>                                                        | <b>8.17</b>             | <b>2.40</b>              |
| Breakfast cereals                 | 10.46                                                               | 5.05                    | 1.88                     |
| Unprocessed cereals               |                                                                     | 0.50                    | 0.01                     |
| Other cereal products             | 1.54                                                                | 2.61                    | 0.51                     |
| <b>Convenience foods</b>          | <b>2.60</b>                                                         | <b>2.40</b>             | <b>2.90</b>              |
| <b>Snack foods</b>                | <b>1.21</b>                                                         | <b>0.76</b>             | <b>0.35</b>              |
| <b>Meat and meat products</b>     | <b>5.24</b>                                                         | <b>6.65</b>             | <b>5.87</b>              |
| Processed meat                    | 2.32                                                                | 2.39                    | 1.49                     |
| Unprocessed meat                  | 2.92                                                                | 4.26                    | 4.38                     |
| <b>Milk and milk products</b>     | <b>4.87</b>                                                         | <b>5.58</b>             | <b>4.44</b>              |
| <b>Other</b>                      | <b>14.62</b>                                                        | <b>12.33</b>            | <b>9.52</b>              |

**Supplementary Table S3.** Sample prevalence of folate deficiency and prevalence adjusted odds ratios (95% CI)-by socio-demographic and lifestyle parameters (N=271).

| Variable         |                               | Folate deficiency |                         |                  |
|------------------|-------------------------------|-------------------|-------------------------|------------------|
|                  |                               | <i>n</i>          | Prevalence <i>n</i> (%) | Odds Ratio (CI)  |
| Overall          | Level                         | 271 (100)         | 25 (9.2)                |                  |
| Age              | Adults                        | 118 (43.5)        | 9 (7.6)                 | 1                |
|                  | Elderly                       | 153 (56.5)        | 16 (10.5)               | 1.22 (0.45-3.29) |
| Sex              | Male                          | 127 (46.9)        | 17 (13.4)               | 1                |
|                  | Female                        | 144 (53.1)        | 8 (5.6)                 | 0.62 (0.22-1.79) |
| Residential area | Rural                         | 143 (52.8)        | 17 (11.9)               | 1                |
|                  | Intermediate                  | 41 (15.1)         | 3 (7.3)                 | 0.92 (0.23-3.64) |
|                  | Urban                         | 87 (32.1)         | 5 (5.8)                 | 0.59 (0.19-1.86) |
| Education        | No university degree          | 193 (71.2)        | 21 (10.9)               | 1                |
|                  | University degree             | 78 (28.8)         | 4 (5.1)                 | 0.73 (0.20-2.61) |
| Financial status | Below average                 | 136 (53.5)        | 14 (10.3)               | 1                |
|                  | Above average                 | 118 (46.5)        | 7 (5.9)                 | 0.54 (0.18-1.62) |
| Employment       | Employed                      | 76 (28.0)         | 2 (2.6)                 | n.a.             |
|                  | Unemployed                    | 9 (3.3)           | 3 (25.0)                |                  |
|                  | Student                       | 6 (3.4)           | 0 (0)                   |                  |
|                  | Retired                       | 177 (65.3)        | 20 (11.3)               |                  |
| BMI              | Normal                        | 92 (34.0)         | 9 (9.8)                 | 1                |
|                  | Overweight and obese          | 179 (66.0)        | 16 (8.9)                | 0.59 (0.21-1.68) |
| IPAQ             | Low intensity                 | 87 (32.2)         | 7 (8.1)                 | 1                |
|                  | Moderate                      | 88 (32.6)         | 9 (10.2)                | 1.94 (0.58-6.45) |
|                  | High intensity                | 95 (35.2)         | 3 (9.5)                 | 1.39 (0.41-4.68) |
| Smoking status   | No smoker                     | 119 (43.9)        | 11 (7.2)                | 1                |
|                  | Current, occasional ex-smoker | 152 (56.1)        | 14 (11.8)               | 1.40 (0.53-3.66) |
| Folate intake    | ≤300 (µg/day)                 | 174 (64.2)        | 15 (8.6)                | 1                |
|                  | >300 (µg/day)                 | 97 (35.8)         | 10 (10.3)               | 0.79 (0.26-2.43) |
| Special diet     | No special diet               | 245 (90.4)        | 25 (10.2)               | n.a.             |
|                  | Medical and/or weight loss    | 26 (9.6)          | 0 (0)                   |                  |
| Behavioral diet  | No diet                       | 267 (98.5)        | 25 (9.36)               | n.a.             |
|                  | Vegetarian / vegan            | 4 (1.5)           | 0 (0)                   |                  |

Notes: Folate deficiency with consideration of combined criteria of low serum folate (<7 nmol/L) and high serum homocysteine (>15 µmol/L) concentration. n.a. indicates variables that were not included in the model. Body mass index (BMI) was considered as normal below 25 kg/m<sup>2</sup>, except for adolescents, where sex/age adjusted cut-off points [22,23] were used. Analysis conducted on samples with excluded missing values (Family net income, n = 17; International Physical Activity Questionnaire (IPAQ), n=1; Education, n=1; Employment, n=1). Model is adjusted for daily energy intake (Kcal/day), which was not significant predictor of folate deficiency (OR: 1.0008, p = 0.127).
